# Supplementary material
Source: publisher figshare collection journal article supplement (https://karger.figshare.com/ndownloader/files/31362832)
Supplement: Supplementary file 1 [file 31362832]

**Supplementary Table 2.** *PNPLA3* I148M (rs738409) associations with ALT, AST, and various liver fibrosis indices in males

| **Phenotype** | **β (SE)#** | **P Value*** | **P Value**** | **P Value***** |
| --- | --- | --- | --- | --- |
| ALT (IU/L) | 5.987 (1.928) | **2.22 x 10-3** | **6.11 x 10-3** | **3.28 x 10-3** |
| AST (IU/L) | 3.613 (1.076) | **9.67 x 10-4** | **3.37 x 10-3** | **2.23 x 10-3** |
| AST/ALT ratio | -0.0575 (0.0313) | NS | NS | **4.57 x 10-2** |
| FIB-4 score | 0.0274 (0.0393) | NS | NS | NS |
| APRI | 0.0515 (0.0157) | **1.3 x 10-3** | **1.53 x 10-3** | **1.51 x 10-3** |
| NAFLD Fibrosis risk score | 0.0655 (0.1296) | NS | NS | NS |

NS = not significant

Bolded values are significant. β = β coefficients, SE = standard error of the coefficient.

#β (SE) derived from the genotype only model.

*Genotype only in the linear regression model.

**Genotype, age, sex and alcohol status included in the linear regression model.

***Genotype, age, sex, BMI and alcohol status included in the linear regression model.
